# Supplementary material for: Direct and indirect measurement of physical activity in older adults: a systematic review of the literature
Source: Springer Nature journal article supplement (doi:10.1186/1479-5868-9-148), 2012-01-01

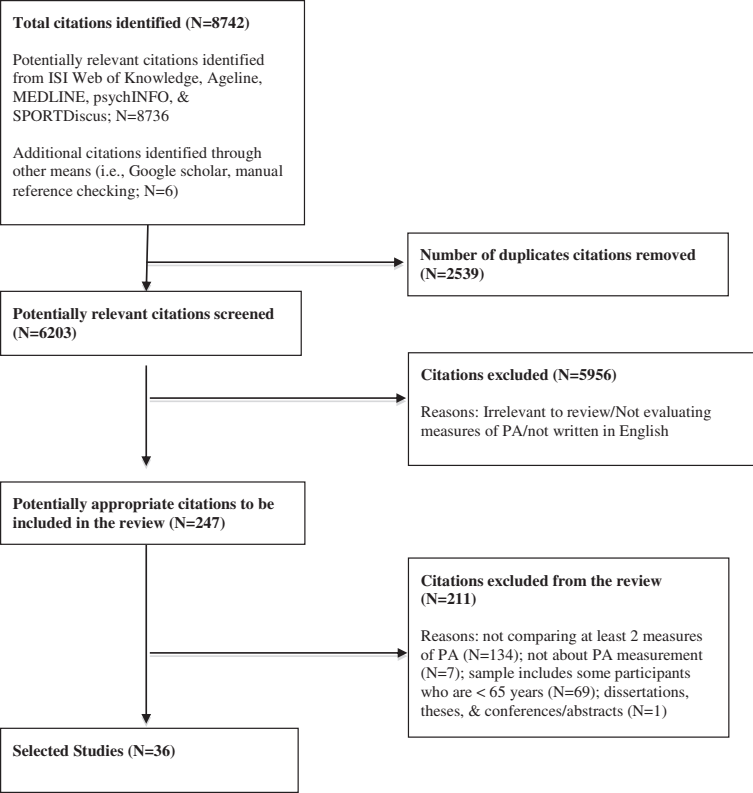

Supplement: 12966_2011_695_MOESM6_ESM.pdf [file 12966_2011_695_MOESM6_ESM.pdf]
